# Supplementary material
Source: publisher figshare collection journal article supplement (https://sage.figshare.com/ndownloader/files/19619768)
Supplement: Supplementary file 1 [file 19619768]

## Sheet: Sheet1
Serial No.	Name	Age	Sex	Religion	Occupation	Average Monthly Income (Household)	Marital Status	No. of Members in the family	No. of Siblings	No. of Siblings with Cleft	Highest Education	Q1	Q2	Q3	Q4	Q5	Q6	Q7A	Q7B	Q8	Q9	Q10	Q11	Q12	Q13	Q14	Q15	Q16	Q17	Q18	Q19	Q20	Q21	Q22	Q23	Q24	Q25	Q26
1	Murshida	18	F	Muslim	Student	5000	Unmarried	4	1	0	High School	1	1,2,6	4	5	2	1	15	2 months	1	1	2	2	1	1	3	3	3	3	1	2	1	1	2	2	4	4	4
2	Dhanya	23	F	Hindu	Professional	10000	Unmarried	4	1	0	Graduate	1	1,2	2	2	3	2	0	0	2	1	2	4	4	3	4	4	4	2	4	4	3	1	4	2	2	4	4
3	AlAmeen	21	M	Muslim	Student	15000	Unmarried	6	3	1	Graduate	1	2	1	1	2	2	0	0	2	2	1	2	2	2	1	1	1	1	1	1	1	2	1	1	1	2	2
4	Nesrudheen	20	M	Muslim	Student	5000	Unmarried	5	2	0	Post Graduate	1	1,2	2	5	1	1	19	2 months	3	1	1	1	1	3	1	3	2	2	3	5	1	1	4	4	2	5	5
5	Asha	20	F	Hindu	Student	5000	Unmarried	4	1	0	Graduate	2	2	3	3	3	1	20	1 year	3	1	2	1	1	2	3	3	2	2	1	5	1	1	5	4	4	5	5
6	Rasna	25	F	Hindu	Homemaker	10000	Married	5	2	0	Graduate	2	6	3	3	3	1	25	1 week	1	1	3	1	1	2	2	3	3	1	2	3	1	1	4	3	4	4	3
7	Rahila Hasna	19	F	Muslim	Student	10000	Unmarried	6	3	0	High School	1	1,2,3	1	5	1	1	16	6 months	4	1	1	3	1	1	1	4	2	2	1	4	1	4	4	2	4	4	4
8	Arfid	23	M	Muslim	Daily Wage	10000	Unmarried	6	3	0	High School	1	0	3	2	4	1	23	6 months	1	1	2	1	1	1	1	2	2	2	3	3	1	3	4	2	2	4	4
9	Shahala	20	F	Muslim	Student	25000	Unmarried	5	2	0	High School	1	6	1	5	2	1	6	6 months	2	1	1	1	1	1	3	2	2	2	1	2	1	1	4	4	4	4	4
10	Anagha	18	F	Hindu	Student	10000	Unmarried	4	1	0	Graduate	1	1	4	5	3	1	4	4 months	1	1	1	1	1	1	2	1	1	1	1	5	1	1	5	4	3	5	5
11	Rakesh	28	M	Hindu	Professional	10000	Unmarried	4	1	0	High School	2	1,2,3,6	2	3	2	2	0	0		2	1	4	1	2	2	1	3	1	2	3	1	3	3	3	3	3	3
12	Likhith Gowda	18	M	Hindu	Student	30000	Unmarried	4	1	0	Graduate	2	1	3	2	3	2	0	0	3	2	3	3	3	3	5	4	1	1	3	3	5	3	3	4	4	4	4
13	Nishad	22	M	Muslim	Student	50000	Unmarried	7	4	0	Graduate	1	0	1	3	1	2	0	0	1	1	1	3	1	1	3	1	1	1	1	3	1	3	3	1	3	3	3
14	Mahima Mathew	28	F	Christian	Professional	20000	Unmarried	4	1	0	Post Graduate	2	1	2	5	1	2	0	0	1	1	1	3	1	1	2	1	1	1	1	3	1	2	3	3	2	1	1
15	Karnitha	20	F	Hindu	Daily Wage	10000	Unmarried	6	3	0	High School	1	2	3	1	2	2	0	0	3	3	5	4	1	3	1	5	4	2	3	4	5	5	3	5	5	3	3
16	Snitha Rao	19	F	Hindu	Student	30000	Unmarried	4	1	0	High School	1	1,2	2	1	2	2	0	0	2	1	2	3	1	1	3	2	2	1	2	2	1	1	2	2	2	1	1
17	Mubeena	18	F	Muslim	Student	6000	Unmarried	8	5	0	Graduate	1	2	1	5	3	1	16	1 year	1	1	2	4	1	1	3	3	3	3	1	3	1	3	3	3	3	5	5
18	Yashaswini	18	F	Hindu	Student	10000	Unmarried	4	1	0	Graduate	2	5	5	3	1	1	17	6 months	1	1	4	5	5	3	4	4	4	5	4	5	1	4	1	2	2	5	5
19	Deepashree	19	F	Hindu	Student	15000	Unmarried	4	1	0	Graduate	2	2	5	3	4	1	16	6 months	5	1	3	4	3	3	3	3	5	2	1	3	1	3	3	5	4	5	4
20	Sajna	20	F	Muslim	Student	15000	Unmarried	6	3	0	Graduate	1	0	3	3	3	1	20	1 year	3	1	1	3	1	1	3	2	1	2	1	2	1	4	4	4	5	5	5
21	Shimjith	22	M	Hindu	Daily Wage	10000	Unmarried	5	2	0	Graduate	2	1,2,3,5	2	5	2	2	0	0	4	4	1	3	1	1	1	1	1	1	3	5	1	3	3	3	3	3	3
22	Adarsh	20	M	Hindu	Student	12000	Unmarried	5	2	0	Graduate	2	1,2	4	3	3	2	0	0	3	2	1	3	3	3	2	3	3	1	4	4	1	4	4	3	3	5	5
23	Shameel	22	M	Muslim	Student	5000	Unmarried	4	1	0	High School	2	2	3	4	3	2	0	0	3	1	1	3	3	2	2	4	1	1	3	4	1	4	4	2	2	4	4
24	Rabeeh	19	M	Muslim	Student	5000	Unmarried	5	2	0	High School	2	1,2	1	4	1	2	0	0	1	1	3	4	1	2	2	3	1	1	3	5	1	4	5	3	1	5	5
25	Adithya Raj	23	F	Hindu	Student	5000	Unmarried	4	1	0	Graduate	1	0	1	5	1	2	0	0	2	2	2	3	1	1	1	2	2	3	2	2	1	1	4	4	5	5	1
26	Dhanesh	25	M	Christian	Professional	5000	Unmarried	4	1	1	Graduate	2	1,5	5	1	5	2	0	0	5	5	3	5	1	4	4	4	4	2	5	4	2	3	4	4	4	4	4
27	Asha	18	F	Hindu	Student	10000	Unmarried	4	1	0	High School	1	2	3	1	3	2	0	0	1	1	3	1	1	2	3	1	3	4	5	1	3	2	1	4	5	3	2
28	Sanjana	18	F	Hindu	Student	1000	Unmarried	4	1	0	High School	2	1,2,5	3	3	3	2	0	0	1	1	1	3	1	1	3	4	5	4	3	4	3		3	3	3	3	1
29	Varsha	18	F	Hindu	Student	5000	Unmarried	6	3	0	High School	2	1	1	3	1	2	0	0	3	1	3	4	1	1	2	3	2	1	1	4	1	1	4	3	4	4	4
30	Sinchana	19	F	Hindu	Student	10000	Unmarried	4	1	0	High School	1	2	2	4	1	2	0	0	2	1	1	1	1	3	3	2	1	1	1	4	3	2	4	4	3	4	3
31	Jayashree Shetty	23	F	Hindu	Professional	15000	Unmarried	5	2	0	Post Graduate	1	2	1	1	1	2	0	0	5	3	1	1	2	1	3	2	2	1	3	4	3	3	4	4	4	4	3
32	Harshitha	26	F	Hindu	Homemaker	4000	Married	5	2	0	High School	1	5	3	5	1	1	20	1 year	1	1	1	1	1	3	3	3	4	1	1	1	1	3	1	2	4	1	4
33	Anandhu	24	M	Hindu	Student	5000	Unmarried	5	2	1	Graduate	1	6	3	2	3	2	0	0	4	1	1	3	1	4	2	1	2	2	1	2	1	3	4	4	4	4	4
34	Asheeq	23	M	Muslim	Student	20000	Unmarried	6	4	0	Post Graduate	1	0	1	1	1	2	0	0	3	1	5	1	3	3	3	3	4	2	3	4	1	1	4	1	1	4	4
35	Mohd. Labeeb	21	M	Muslim	Daily Wage	10000	Unmarried	6	3	0	High School	2	1,2,3	4	5	4	1	21	6 months	1	1	1	3	1	1	1	5	1	2	3	4	1	5	4	2	4	4	5
36	Sumith Babu	28	M	Hindu	Professional	7000	Unmarried	4	1	0	Graduate	1	6	1	4	2	1	28	3 months	3	1	1	1	1	1	3	1	1	1	2	5	1	1	5	2	2	5	4
37	Mahesh	29	M	Hindu	Daily Wage	8000	Unmarried	5	2	0	High School	2	1,2	5	1	3	1	10	3 years	3	1	1	3	3	3	3	3	1	1	1	3	1	3	2	1	4	4	3
38	Murshida	19	F	Muslim	Student	10000	Unmarried	11	8	0	High School	1	2,6	5	3	3	1	14	1 year	1	1	3	1	1	1	3	3	3	3	3	3	1	4	3	2	1	1	4
39	Anas	22	M	Muslim	Student	15000	Unmarried	6	3	0	Graduate	1	0	1	5	1	2	0	0	2	1	1	1	1	1	2	2	1	1	2	5	1	1	5	4	2	5	5
40	Shabna	22	F	Muslim	Student	1000	Unmarried	5	2	0	Graduate	1	6	5	3	3	1	21	1 year	5	1	1	3	1	1	3	3	2	2	1	2	1	1	2	3	2	4	5
41	Arfaz	18	M	Muslim	Student	5000	Unmarried	4	1	0	High School	2	2	3	3	3	1	12	5 months	1	1	1	3	1	4	3	3	2	1	4	4	1	1	4	3	4	4	4
42	Sukanya	24	F	Hindu	Student	10000	Unmarried	4	1	0	Primary School	2	5,6	1	2	1	2	0	0	1	1	2	2	1	4	1	2	2	2	1	2	1	2	4	3	3	4	4
43	Sathin Hegde	25	M	Hindu	Professional	240000	Unmarried	7	4	0	Graduate	1	1,2	3	1	3	2	0	0	1	1	3	3	1	3	3	4	2	2	1	2	3	1	4	2	2	4	4
44	Renjitha	30	F	Hindu	Homemaker	1000	Unmarried	6	3	0	High School	2	1,2,4,5,6	5	2	4	2	0	0	4	2	3	4	4	4	1	4	3	1	3	4	1	5	5	3	3	4	4
45	Vinny Thomas	18	F	Christian	Student	12000	Unmarried	5	2	0	High School	1	5	3	3	3	1	7	1 year	1	1	1	3	1	2	5	3	2	1	4	4	1	2	4	4	4	4	2
46	Suhaib	24	M	Muslim	Professional	15000	Unmarried	6	3	0	High School	1	1,6	4	1	3	2	0	0	3	1	1	2	1	1	2	4	5	1	2	5	1	2	5	3	3	5	5
47	Jeshbin Joy	20	M	Christian	Student	12000	Unmarried	5	2	0	Graduate	1	1	3	3	3	1	17	1 year	3	3	1	2	1	3	3	2	1	1	3	5	1	1	4	2	2	5	5
48	Abdul Wahid	24	M	Muslim	Professional	15000	Unmarried	9	6	0	Post Graduate	2	1,2	5	1	3	1	16	1 year	3	3	1	4	1	3	3	2	2	1	3	4	1	2	5	4	5	5	5
49	Nandana	18	F	Hindu	Student	16000	Unmarried	4	1	0	High School	1	1	3	2	3	2	0	0	2	1	1	1	1	2	3	4	2	2	3	4	1	1	4	2	2	4	4
50	Kavya	19	F	Hindu	Student	5000	Unmarried	4	1	0	Graduate	1	1	1	52	2	0	0	1	1	1	1	1	1	2	3	2	2	1	4	1	1	4	4	4	4	4	4
51	Saju	29	M	Hindu	Unemployed	5000	Unmarried	4	1	1	High School	1	6	3	3	4	1	28	1 year	3	3	2	3	1	1	4	4	4	4	3	5	1	3	5	5	5	5	5
52	Nasni Razak	18	F	Muslim	Homemaker	10000	Unmarried	4	1	0	Graduate	2	1,2	3	3	3	2	0	0	3	3	1	3	1	3	3	3	3	1	3	3	1	3	4	3	3	4	4
53	Bhoomika	18	F	Hindu	Student	100000	Unmarried	4	1	0	Graduate	2	3	3	4	1	2	0	0	3	1	1	3	1	1	3	2	5	2	4	3	4	5	3	4	4	4	5
54	Kanchana	23	F	Hindu	Professional	11000	Unmarried	5	2	1	Post Graduate	1	2	3	1	2	2	0	0	1	1	1	1	1	1	2	2	1	1	1	4	1	1	1	2	2	5	5
55	Jins James	18	M	Christian	Student	10000	Unmarried	5	2	0	High School	1	1	3	5	3	1	12	1 year	1	1	1	1	1	1	3	2	1	2	3	5	1	1	2	1	1	4	5
56	Neethu	18	F	Hindu	Student	10000	Unmarried	4	1	0	High School	2	1,2	4	2	4	1	5	1 year	4	4	3	3	1	1	3	4	2	3	3	4	1	4	4	4	2	4	4
57	Anto CB	22	F	Christian	Student	12000	Unmarried	4	1	0	High School	2	1,2	4	2	3	2	0	0	1	3	2	3	1	1	3	4	4	2	3	4	1	1	4	1	4	5	5
58	Vipin	24	M	Hindu	Professional	6000	Unmarried	3	0	0	High School	1	0	5	3	4	2	0	0	1	1	3	1	1	1	1	4	3	2	1	1	1	1	3	4	4	3	3
59	Vishnuanandh	23	M	Hindu	Student	4000	Unmarried	4	1	0	Graduate	2	2,6	2	5	2	2	0	0	2	1	2	2	1	1	2	2	2	2	3	4	2	2	5	4	4	5	5
60	Tom TT	21	M	Christian	Student	35000	Unmarried	5	2	0	Graduate	1	1	4	4	1	2	0	0	1	1	1	2	1	1	2	2	2	1	2	4	1	3	4	3	2	4	4
61	Suhas	19	M	Hindu	Unemployed	12000	Unmarried	4	1	0	Graduate	2	2	4	3	2	2	0	0	3	1	2	5	4	3	1	4	2	1	1	1	1	3	2	2	4	5	4
62	Ranjith GS	20	M	Hindu	Student	10000	Unmarried	4	1	0	High School	2	1,2,5	3	3	3	2	0	0	1	1	1	1	1	3	2	3	3	1	2	4	1	1	5	1	3	4	4
63	Mubasheera	20	F	Muslim	Student	3000	Unmarried	4	1	0	Primary School	1	1,2	5	5	4	2	0	0	3	3	1	4	4	3	4	4	4	1	4	4	3	3	5	2	2	4	5
64	Mohd. Shihab	18	M	Muslim	Student	15000	Unmarried	3	0	0	High School	1	4	3	3	3	1	14	1 year	3	3	1	1	3	3	5	2	3	3	5	2	2	3	5	2	2	2	2
65	Vinay Hegde	19	M	Hindu	Student	10000	Unmarried	5	2	0	High School	2	1,2,4,5,6	4	3	2	2	0	0	3	1	4	1	2	2	5	4	2	2	1	5	1	1	4	4	4	4	5
66	Mohd. Ajmal	19	M	Muslim	Student	10000	Unmarried	7	4	1	High School	2	1,2,6	1	3	1	2	0	0	1	1	1	3	3	3	3	3	1	1	2	2	2	2	3	3	2	4	5
67	Deepthi Tauro	21	F	Christian	Student	11000	Unmarried	5	2	0	Graduate	1	1	3	1	1	2	0	0	1	1	4	1	1	1	3	1	1	1	1	4	1	3	4	4	3	5	4
68	Mustafa	29	M	Muslim	Daily Wage	6000	Unmarried	8	5	0	Primary School	1	1	5	3	5	1	23	1 month	1	1	2	1	1	1	1	2	2	5	1	4	1	3	4	2	2	4	4
69	Jashim	25	M	Muslim	Unemployed	8000	Married	6	3	1	High School	2	4	3	3	3	2	0	0	4	4	1	4	3	2	4	3	3	2	3	3	4	4	4	2	2	3	3
70	Shrinivas	21	M	Hindu	Unemployed	8000	Unmarried	5	2	0	Graduate	1	2,4,6	3	1	3	1	13	1 year	3	1	3	1	1	1	1	1	1	1	1	3	3	3	3	4	3	5	1
71	Mohd. Ashique	22	M	Muslim	Student	1500	Unmarried	4	1	0	Graduate	1	2	3	4	2	2	0	0	1	1	1	2	1	1	1	1	1	1	2	4	2	1	5	5	5	4	5
72	Hajira PA	22	F	Muslim	Student	1000	Unmarried	7	4	0	Graduate	2	1,2,6	3	3	1	1	22	3 months	1	1	1	3	1	1	1	1	1	1	3	4	1	1	5	3	2	5	5
73	Adnan	20	M	Muslim	Student	1200	Unmarried	4	1	0	Graduate	2	1,2,4,6	2	4	2	1	20	1 year	3	1	1	1	1	2	1	1	2	1	2	4	1	4	2	4	3	5	1
74	Rabiyath	27	F	Muslim	Student	1500	Unmarried	7	4	0	Graduate	1	6	3	4	5	1	25	1 year	1	1	1	1	3	1	3	4	2	1	3	4	1	1	2	4	4	4	4
75	Basil Mathew	24	M	Christian	Professional	5000	Unmarried	4	1	0	Post Graduate	1	0	4	5	1	1	22	5 months	1	1	5	1	1	2	1	2	2	2	3	5	1	1	5	4	4	4	5
76	Tina	28	F	Christian	Homemaker	4000	Married	5	2	1	High School	1	2	3	3	3	1	24	1 year	1	1	2	3	1	1	1	2	4	2	1	2	1	2	1	4	2	2	4
77	Akhil	22	M	Hindu	Professional	9500	Unmarried	4	1	0	Graduate	1	5	3	3	3	2	0	0	1	1	1	3	2	4	1	4	2	2	2	4	1	1	4	2	2	4	4
78	Suhail	18	M	Muslim	Student	10000	Unmarried	4	1	0	Graduate	1	1,2	1	5	3	1	18	6 months	1	1	3	1	1	3	2	3	3	3	2	5	1	5	1	3	3	4	3
79	Varsha	21	F	Hindu	Student	12000	Unmarried	4	1	0	High School	2	2	1	3	1	2	0	0	1	1	1	4	4	1	5	3	3	3	4	3	1	5	3	5	5	4	4
80	Vani R	24	M	Hindu	Professional	10000	Unmarried	4	1	0	High School	1	1	3	1	3	1	20	3 months	4	3	3	2	3	3	4	3	2	2	1	2	1	1	2	2	4	4	4
81	Chethan Kumar	18	M	Hindu	Student	7000	Unmarried	5	2	0	High School	1	1,2	4	2	5	1	18	9 months	1	2	1	1	1	1	3	5	1	1	1	1	1	4	2	1	2	5	5
82	Poornesh	18	M	Hindu	Student	10000	Unmarried	3	0	0	Graduate	2	2	5	1	5	2	0	0	3	1	3	3	1	1	4	5	2	5	3	4	1	3	4	4	4	5	5
83	Amaya Balakrishna	18	F	Hindu	Unemployed	3000	Unmarried	4	1	0	High School	1	0	5	1	4	2	0	0	2	1	1	3	4	4	3	1	2	3	4	2	1	3	5	4	4	5	5
84	Nitesh	20	M	Hindu	Daily Wage	3000	Unmarried	4	1	0	High School	1	0	1	3	2	2	0	0	1	3	2	1	1	3	2	1	4	2	1	3	1	1	5	3	3	4	4
85	Syamna NS	19	F	Hindu	Student	20000	Unmarried	5	2	0	High School	2	1,6	1	5	1	2	0	0	1	1	2	3	1	1	3	4	1	1	1	5	1	1	4	4	4	4	4
86	Nanjunda	25	M	Hindu	Daily Wage	7500	Unmarried	5	2	0	High School	1	2,3	1	1	1	2	0	0	1	1	1	2	1	1	2	1	1	1	1	5	3	1	2	4	4	5	5
87	Sinfana	27	F	Muslim	Homemaker	9000	Married	5	2	0	High School	1	0	1	5	3	1	19	1 year	1	1	3	1	1	1	1	4	3	3	3	5	1	1	4	4	4	4	4
88	Geethu	24	F	Hindu	Student	18000	Married	5	2	0	Graduate	1	0	1	2	5	2	0	0	3	3	1	3	1	3	3	3	3	1	3	3	1	3	4	3	3	4	4
89	Javed	23	M	Muslim	Daily Wage	2500	Married	6	3	0	High School	1	1,2	2	4	5	2	0	0	3	1	1	3	1	1	3	2	5	2	4	3	4	5	3	4	4	4	5
90	Abdullah	19	M	Muslim	Student	10000	Unmarried	6	3	0	High School	1	0	1	3	2	2	0	0	1	1	1	1	1	1	2	2	1	1	1	4	1	1	1	2	2	5	5
91	Narendra	28	M	Hindu	Professional	15000	Married	5	2	0	High School	2	1,4	1	3	5	2	0	0	1	1	1	1	1	1	3	2	1	2	3	5	1	1	2	1	1	4	5
92	Shivkumar	18	M	Hindu	Student	20000	Unmarried	4	1	0	Graduate	1	0	2	1	1	2	0	0	4	4	3	3	1	1	3	4	2	3	3	4	1	4	4	4	2	4	4
93	Fatima	28	F	Muslim	Professional	6000	Married	4	1	0	High School	2	5,6	2	5	4	1	11	1 year	1	3	2	3	1	1	3	4	4	2	3	4	1	1	4	1	4	5	5
94	Ruksar	21	F	Muslim	Student	30000	Unmarried	4	1	0	Graduate	1	1	1	2	2	2	0	0	1	1	3	1	1	1	1	4	3	2	1	1	1	1	3	4	4	3	3
95	Narayana	23	M	Hindu	Student	15000	Unmarried	7	4	0	Graduate	2	5	3	5	5	2	0	0	2	1	2	2	1	1	2	2	2	1	3	4	2	2	5	4	4	5	5
96	Jijo	26	M	Christian	Professional	10000	Unmarried	4	1	0	Post Graduate	2	4	1	1	2	1	14	6 months	1	1	1	2	1	1	2	2	2	1	2	4	1	3	4	3	2	4	4
97	Sherinsha	19	F	Muslim	Student	5000	Unmarried	6	3	0	High School	1	0	2	5	5	2	0	0	3	1	2	5	4	3	1	4	2	1	1	1	1	3	2	2	4	5	4
98	Thomas	20	M	Christian	Student	14000	Unmarried	4	1	0	High School	2	3	1	4	1	1	14	8 months	1	1	1	1	1	3	2	3	3	1	2	4	1	1	5	1	3	4	4
99	Venkat	21	M	Hindu	Student	5000	Unmarried	8	5	0	Graduate	2	1,4	2	4	3	2	0	0	3	3	1	4	4	3	4	4	4	1	4	4	3	3	5	2	2	4	5
100	Nusrat	25	F	Muslim	Homemaker	10000	Unmarried	4	1	0	Graduate	1	1	1	2	3	1	21	1 year	3	3	1	1	3	3	5	2	3	3	5	2	2	3	5	2	2	2	2
